# Supplementary material for: Metabolic Syndrome Increases Mortality Risk in Dialysis Patients: A Systematic Review and Meta-Analysis
Source: PubMed Central journal article supplement — Int J Endocrinol Metab. 2018 Feb 7;16(2):e61201. doi: 10.5812/ijem.61201 (PMC6176464; doi:10.5812/ijem.61201), 2018-02-07

## Appendix 1: Search Strategy

### Search Strategy:

#### MEDLINE

- 1 renal insufficiency, chronic.mp. or exp Renal Insufficiency, Chronic/
- 2 exp Kidney Failure, Chronic/ or kidney failure, chronic.mp.
- 3 renal dialysis.mp. or exp Renal Dialysis/
- 4 ESRD.mp.
- 5 End stage kidney disease.mp.
- 6 End stage renal disease.mp.
- 7 peritoneal dialysis.mp. or exp Peritoneal Dialysis/
- 8 exp Metabolic Syndrome X/ or metabolic syndrome.mp.
- 9 insulin resistance.mp. or exp Insulin Resistance/
- 10 exp Obesity, Abdominal/
- 11 1 or 2 or 3 or 4 or 5 or 6 or 7
- 12 8 or 9 or 10
- 13 11 and 12

#### Embase

#### SEARCH QUERY

-----

((('metabolic syndrome'/exp and [embase]/lim) or ('insulin resistance'/exp and [embase]/lim) or ('prediabetic stage'/exp and [embase]/lim) or ('abdominal obesity'/exp and [embase]/lim) or ('metabolic syndrome' and [embase]/lim) or ('abdominal obesity' and [embase]/lim) or ('abdominal obese' and [embase]/lim) or ('mets' and [embase]/lim) or ('insulin resistance syndrome' and [embase]/lim)) and ((('chronic renal failure'/exp and [embase]/lim) or ('dialysis'/exp and [embase]/lim) or ('uremia'/exp and [embase]/lim) or ('hemodialysis'/exp and [embase]/lim) or ('peritoneal dialysis'/exp and [embase]/lim) or ('hemofiltration'/exp and [embase]/lim) or ('hemodiafiltration'/exp and [embase]/lim) or (hemodialys\* and [embase]/lim) or (uremia and [embase]/lim) or (crf and [embase]/lim) or (ckf and [embase]/lim) or (haemodialys\* and [embase]/lim) or ('peritoneal dialysis' and [embase]/lim) or ('peritoneal dialysed' and [embase]/lim) or ('peritoneal dialyse' and [embase]/lim) or ('hemofiltration' and [embase]/lim) or ('haemofiltration' and [embase]/lim) or ('hemodiafiltration' and [embase]/lim) or ('haemodiafiltration' and [embase]/lim)) and [humans]/lim

## Cochrane

- #1 MeSH descriptor: [Metabolic Syndrome X] explode all trees
- #2 MeSH descriptor: [Insulin Resistance] explode all trees
- #3 MeSH descriptor: [Prediabetic State] explode all trees
- #4 MeSH descriptor: [Obesity, Abdominal] explode all trees
- #5 metabolic syndrome
- #6 abdominal obes\*
- #7 Insulin resistance syndrome
- #8 Mets
- #9 MeSH descriptor: [Renal Insufficiency, Chronic] explode all trees 3860
- #10 MeSH descriptor: [Kidney Failure, Chronic] explode all trees 3459
- #11 MeSH descriptor: [Renal Dialysis] explode all trees 4396
- #12 MeSH descriptor: [Uremia] explode all trees 407
- #13 ESRD 903
- #14 End stage renal 3283
- #15 End stage kidney 2373
- #16 CKF
- #17 CRF
- #18 renal failure
- #19 hemodialys\*
- #20 kidney failure
- #21 peritoneal dialys\*
- #22 hemofiltration
- #23 hemodiafiltration
- #24 uremi\*
- #25 haemodialys\*
- #26 haemodiafiltration
- #27 haemofiltration
- #28 #9 or #10 or #11 or #12 or #13 or #14 or #15 or #16 or #17 or #18 or #19 or #20 #21 or #22 or #23 or #24 or #25 or #26 or #27

#29 #1 or #2 or #3 or #4 or #5 or #6 or #7 or #8

#30 #28 and #29

## Appendix 2

| Group by               | Study name  | Statistics for each study |              |              |
|------------------------|-------------|---------------------------|--------------|--------------|
|                        |             | Risk ratio                | Lower limit  | Upper limit  |
| Factors adjustment     | Liao 2011   | 3.657                     | 1.904        | 7.024        |
|                        | Xie 2012    | 0.676                     | 0.315        | 1.451        |
|                        | Yang 2007   | 1.023                     | 0.595        | 1.757        |
|                        | Wu 2011     | 2.300                     | 0.789        | 6.706        |
|                        | Prasad 2013 | 7.420                     | 3.049        | 18.056       |
|                        | Vogt 2014   | 2.640                     | 1.061        | 6.568        |
| <b>No adjustment</b>   |             | <b>2.144</b>              | <b>1.052</b> | <b>4.371</b> |
| With adjustment        | Liao 2011   | 2.064                     | 1.278        | 3.334        |
|                        | Park 2010   | 3.830                     | 1.111        | 13.208       |
|                        | Prasad 2013 | 5.390                     | 2.057        | 14.121       |
| <b>With adjustment</b> |             | <b>3.039</b>              | <b>1.606</b> | <b>5.751</b> |

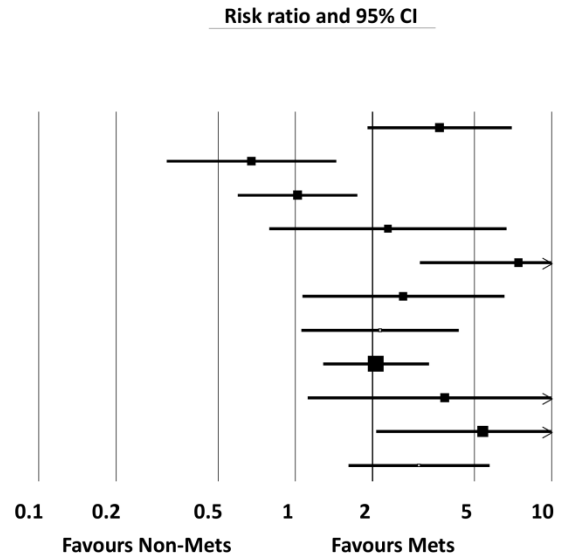

Supplement: ijem-16-02-61201-s001.pdf [file ijem-16-02-61201-s001.pdf]
